# Supplementary material for: Colloidal particles in blue phase liquid crystals
Source: Royal Society of Chemistry journal article supplement (doi:10.1039/c4sm02131b), 2015-01-01
Supplement: c4sm02131b1.pdf [file c4sm02131b1.pdf]

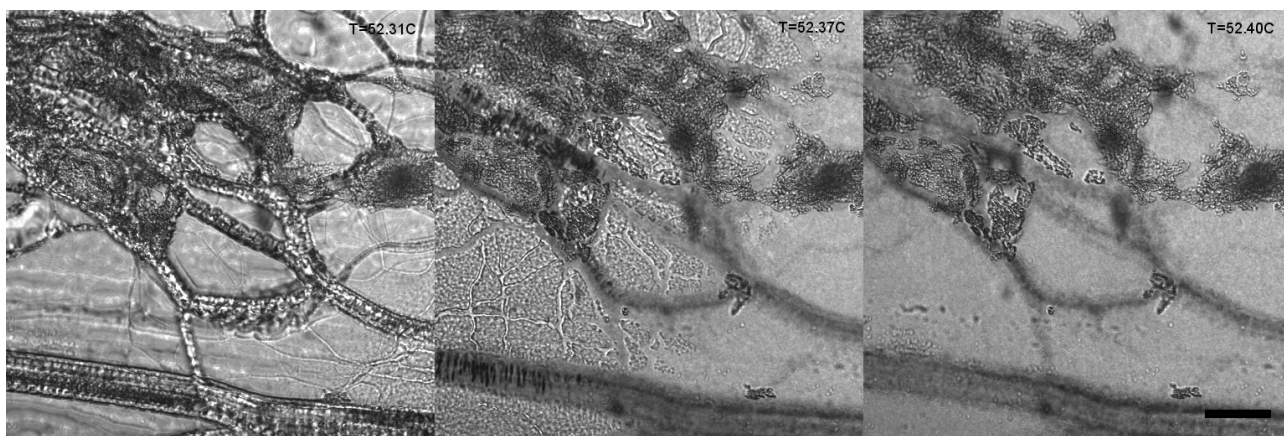

Figure 1: Phase transition from Cholesteric to BP1 with  $r = 0.5 \mu\text{m}$  colloids. Scale bar  $50 \mu\text{m}$

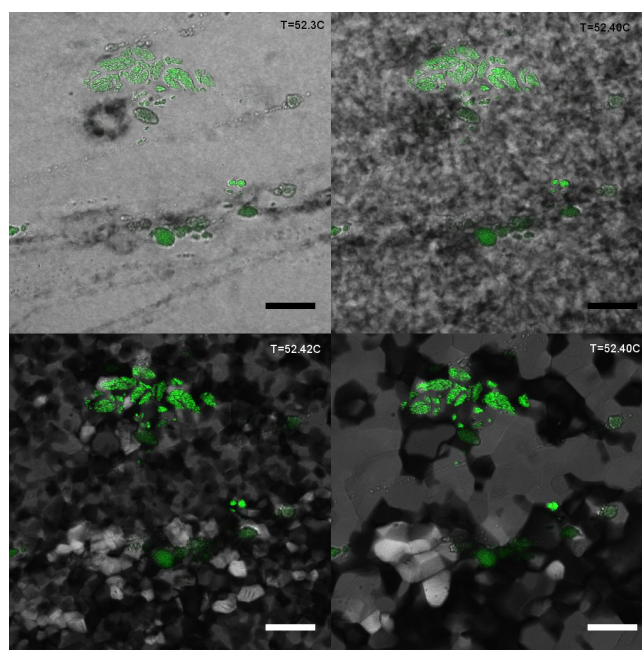

Figure 2: Phase transition from BPI to BPII with  $r = 0.5 \mu\text{m}$  colloids. Scale bar  $50 \mu\text{m}$

We include images of  $r = 0.5 \mu\text{m}$  colloidal particles dispersed in blue phase exhibiting liquid crystal. Their behaviour is qualitatively the same as for  $r = 1.5 \mu\text{m}$  colloidal particles.

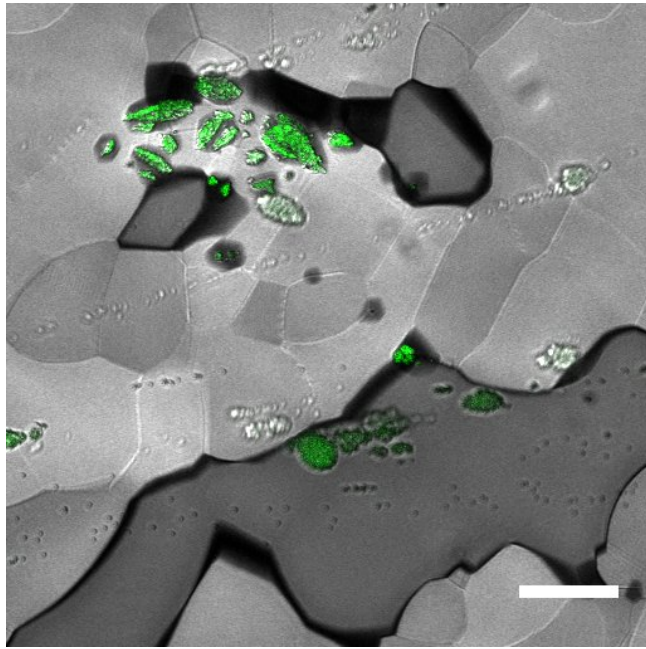

Figure 3: Facetted inclusions around  $r = 0.5 \mu\text{m}$  colloids in BPII. It should be noted that the darkest regions are not melted but still in the blue phase. Scale bar  $50 \mu\text{m}$
